# Supplementary material
Source: PubMed Central journal article supplement (PMC6481309)

**SUPPLEMENTARY MATERIAL**

**eTable 1: Full list of variables considered for readmission risk model**

| <b>Variable</b>                                                                    | <b>Categories</b>                                                                                                          |
|------------------------------------------------------------------------------------|----------------------------------------------------------------------------------------------------------------------------|
| Any Activity of Daily Living (ADL) domain impaired                                 | 1=Yes, 0=No                                                                                                                |
| Avoided health care services because of cost                                       | 1=Yes, 0=No                                                                                                                |
| Body mass index (BMI)                                                              | 1=Low or Normal weight: BMI < 25,<br>2=Overweight: 25 <= BMI < 30,<br>3=Obese: BMI >= 30                                   |
| Calculated age                                                                     | Numerical                                                                                                                  |
| 2 or more episodes of severe chest pain (angina) 24 hours before going to hospital | 1=Yes, 0=No                                                                                                                |
| Controlled Word Association Test (COWAT): Total S words                            | Numerical                                                                                                                  |
| ECG Changes                                                                        | 1=No ischemic ECG changes,<br>2=ST segment depression or T wave inversion in 2 contiguous leads,<br>3=ST segment elevation |
| Highest level of education                                                         | 1= ≤12 years<br>0= or less                                                                                                 |
| Finances at the end of the month                                                   | 1=Some money left over,<br>2=Just enough to make ends meet,<br>3=Not enough to make ends meet                              |
| Number of falls in past year                                                       | 1=Two or more<br>0=None or one                                                                                             |
| Respirations (first available)                                                     | Numerical                                                                                                                  |
| First diastolic blood pressure categories                                          | 1=<50,<br>2=50-59,<br>3=60-69,<br>4=70-79,<br>5=80-89,<br>6=90-99,<br>7=>=100                                              |
| First heart rate categories                                                        | 1=<50,<br>2=50-69,<br>3=70-79,<br>4=80-89,<br>5=90-99,<br>6=100-109,<br>7=110-129,<br>8=130-149,<br>9=>=150                |

|                                                                               |                                                                                                                   |
|-------------------------------------------------------------------------------|-------------------------------------------------------------------------------------------------------------------|
| First systolic blood pressure categories                                      | 1=<80,<br>2=80-99,<br>3=100-109,<br>4=110-119,<br>5=120-129,<br>6=130-139,<br>7=140-159,<br>8=160-179,<br>9=>=180 |
| Glomerular filtration rate (Initial)                                          | Numerical                                                                                                         |
| Weak grip strength                                                            | 1=Yes, 0=No                                                                                                       |
| Hearing impaired (how much does your hearing interfere with your activities?) | 1=not at all<br>2=a little<br>3=a moderate amount<br>4=a lot                                                      |
| In-hospital adverse event - Acute kidney injury*                              | 1=Yes, 0=No                                                                                                       |
| In hospital adverse event - Arrhythmia*                                       | 1=Yes, 0=No                                                                                                       |
| In hospital adverse event - Bleeding*                                         | 1=Yes, 0=No                                                                                                       |
| In hospital adverse event - Heart Failure*                                    | 1=Yes, 0=No                                                                                                       |
| In hospital adverse event - Hyperglycemia*                                    | 1=Yes, 0=No                                                                                                       |
| In-hospital LVEF categories                                                   | 1= >=50%,<br>2= 40-50%,<br>3= 30-40%,<br>4= <30%                                                                  |
| Hemoglobin initial value (first available)                                    | Numerical                                                                                                         |
| Killip Class                                                                  | 0=Killip I,<br>1=Killip II, III or IV                                                                             |
| Live alone                                                                    | 1=Yes, 0=No                                                                                                       |
| Length of stay (days)                                                         | Numerical                                                                                                         |
| Male                                                                          | 1=Yes, 0=No                                                                                                       |
| Marital status                                                                | 1= Married or living as<br>married / living with<br>partner,<br>2= Divorced / separated /<br>single / widowed     |
| SF-12 general health status                                                   | 1=Excellent<br>2=very good<br>3=good<br>4=fair/poor                                                               |
| Final reconciled AMI diagnosis                                                | 1= NSTEMI,<br>0= STEMI,                                                                                           |
| Able to walk 1/4 mile 1 month before going to hospital                        | 1=Yes, 0=No                                                                                                       |
| Non sinus rhythm (1st or 2nd ECG)                                             | 1=Yes, 0=No                                                                                                       |
| Race                                                                          | 1=non-white<br>0=white                                                                                            |
| Did not take prescribed medication because of the cost                        | 1=Yes, 0=No                                                                                                       |
| Time from symptom onset to presentation                                       | 1= ≥6 hours,<br>0= <6 hours                                                                                       |

|                                                               |                                                                                                 |
|---------------------------------------------------------------|-------------------------------------------------------------------------------------------------|
| Peak troponin to upper limit of normal (ULN) ratio            | Numerical                                                                                       |
| Depressive symptoms (PHQ positive screen)                     | 1=Yes, 0=No                                                                                     |
| Aspirin on day of or within 24 hrs of admission               | 1=Yes, 0=No                                                                                     |
| ACEI/ARB within 24 hrs of admission                           | 1=Yes, 0=No                                                                                     |
| Antiplatelet within 24 hrs of admission                       | 1=Yes, 0=No                                                                                     |
| Beta blocker within 24 hrs of admission                       | 1=Yes, 0=No                                                                                     |
| Statin within 24 hrs of admission                             | 1=Yes, 0=No                                                                                     |
| Prior history of arrhythmias                                  | 1=Yes, 0=No                                                                                     |
| Prior history of coronary artery disease                      | 1=Yes, 0=No                                                                                     |
| Prior history of cerebrovascular disease                      | 1=Yes, 0=No                                                                                     |
| Prior history of heart failure                                | 1=Yes, 0=No                                                                                     |
| Prior history of chronic obstructive pulmonary disease (COPD) | 1=Yes, 0=No                                                                                     |
| Prior history of diabetes mellitus (DM)                       | 1=Yes, 0=No                                                                                     |
| Prior history of hypertension                                 | 1=Yes, 0=No                                                                                     |
| Prior history of cancer                                       | 1=Yes, 0=No                                                                                     |
| Prior history of AMI                                          | 1=Yes, 0=No                                                                                     |
| Prior history of peripheral arterial disease (PAD)            | 1=Yes, 0=No                                                                                     |
| Prior history of peptic ulcer disease                         | 1=Yes, 0=No                                                                                     |
| Prior cardiac revascularization                               | 1=Yes, 0=No                                                                                     |
| Prior history of sleep apnea                                  | 1=Yes, 0=No                                                                                     |
| Prior history of valve disease                                | 1=Yes, 0=No                                                                                     |
| Current or ever smoker                                        | 1=Yes, 0=No                                                                                     |
| Social support: someone to help with chores                   | 0=Most of the time/all of the time,<br>1=None of the time/a little of the time/some of the time |
| Social support: someone to confide in                         | 0=Most of the time/all of the time,<br>1=None of the time/a little of the time/some of the time |
| Social support: someone to love and make you feel wanted      | 0=Most of the time/all of the time,<br>1=None of the time/a little of the time/some of the time |
| Social support: someone to relax with                         | 0=Most of the time/all of the time,<br>1=None of the time/a little of the time/some of the time |
| Social support: someone to turn for suggestions               | 0=Most of the time/all of the time,<br>1=None of the time/a little of the time/some of the time |
| Telephone Interview for Cognitive Status (TICS) total score   | Numerical                                                                                       |

|                                                                                                                                                                                                                                                                                                                                                                                                                                                                                                                                                                                                                                  |                                                                                                                                            |
|----------------------------------------------------------------------------------------------------------------------------------------------------------------------------------------------------------------------------------------------------------------------------------------------------------------------------------------------------------------------------------------------------------------------------------------------------------------------------------------------------------------------------------------------------------------------------------------------------------------------------------|--------------------------------------------------------------------------------------------------------------------------------------------|
| Timed Up and Go (functional mobility)                                                                                                                                                                                                                                                                                                                                                                                                                                                                                                                                                                                            | 1=Completed in <= 15 seconds,<br>2=Completed in > 15 and <= 25 seconds,<br>3=Completed in > 25 seconds,<br>4=Unable to complete assessment |
| Cachexia (unintentional weight loss > 10 lbs. in past year)                                                                                                                                                                                                                                                                                                                                                                                                                                                                                                                                                                      | 1=Yes, 0=No                                                                                                                                |
| Visual impairment (vision at current time)                                                                                                                                                                                                                                                                                                                                                                                                                                                                                                                                                                                       | 1=excellent<br>2=good<br>3=fair<br>4=poor/very poor/completely blind                                                                       |
| White blood cell highest value                                                                                                                                                                                                                                                                                                                                                                                                                                                                                                                                                                                                   | Numerical                                                                                                                                  |
| <p>*Definitions for in-hospital complications:</p> <p><u>Acute kidney injury</u>: increase in serum creatinine of <math>\geq 0.3</math> mg/dL from baseline or <math>\geq 1.5</math> times baseline.</p> <p><u>Arrhythmia</u>: new-onset atrial fibrillation or ventricular tachycardia.</p> <p><u>Bleeding</u>: any intracranial bleed, hemoglobin drop <math>&gt; 3</math>g/dL, blood transfusion, or bleeding requiring intervention.</p> <p><u>Heart failure</u>: physician-adjudicated decompensated heart failure, not present on admission.</p> <p><u>Hyperglycemia</u>: any blood sugar <math>&gt; 250</math> mg/dL.</p> |                                                                                                                                            |

**eTable 2: Definition of functional impairments**

| <b>Functional impairment</b>                | <b>Definition</b>                                                                                                                                                                                                                                                                                                                               | <b>Reference</b> |
|---------------------------------------------|-------------------------------------------------------------------------------------------------------------------------------------------------------------------------------------------------------------------------------------------------------------------------------------------------------------------------------------------------|------------------|
| General cognitive impairment                | Score on Telephone Interview for Cognitive Status (TICS) of 23-26 (mild) or $\leq 22$ (moderate/severe).                                                                                                                                                                                                                                        | 13               |
| Verbal fluency                              | Controlled Word Association TEST (COWAT) (analyzed continuously; lower score indicates worse function).                                                                                                                                                                                                                                         | 14               |
| Vision Impairment                           | Derived from Visual Functioning Questionnaire (VFQ-25) items and defined as: <ul style="list-style-type: none"><li>• “At the present time, would you say your eyesight using both eyes is excellent, good, fair, poor, or very poor or are you completely blind?” with responses of “fair,” “poor,” “very poor” or “completely blind”</li></ul> | 15               |
| Hearing Impairment                          | Global question on dysfunction imposed by hearing impairment: , “How much does your hearing interfere with your activities?” with responses of “not at all,” “a little,” “a moderate amount,” and “a lot”.                                                                                                                                      | 16               |
| Unintentional weight loss (cachexia)        | Loss of >10 pounds in year prior to baseline interview.                                                                                                                                                                                                                                                                                         |                  |
| Activities of daily living (ADL) impairment | Self-reported impairment (needing partial help or completely dependent on others) in any of the following essential activities: (1) bathing; (2) dressing; (3) getting in and out of a chair (transferring); (4) ambulating.                                                                                                                    | 17               |
| Depressive symptoms                         | Score on Patient Health Questionnaire-8 (PHQ-8) $\geq 10$ .                                                                                                                                                                                                                                                                                     | 18               |
| Grip strength                               | Based on highest measurement (of 3 attempts) using handheld dynamometer (B&L Engineering, Santa Ana, CA) with dominant hand. Sex-adjusted cutoffs for abnormal (weak) upper extremity strength: : Abnormal if <28.5 kg (men), <18.5 kg (women).                                                                                                 | 19               |
| Functional mobility                         | Based on Timed Up and Go test (TUG). Mobility divided into four categories: (1) completed TUG in $\leq 15$ seconds; completed TUG in >15 to $\leq 25$ seconds; (3) completed TUG in >25 seconds; (4) unable to complete TUG.                                                                                                                    | 20               |
| Fall history                                | Number of falls within past year (0 vs. 1 vs. $\geq 2$ ).                                                                                                                                                                                                                                                                                       |                  |

**eTable 3. Posterior Effect Probabilities**

| Variable         | Posterior Effect Probability* from 20 Imputations of Derivation Cohort (n=2004)       |      |      |      |      |      |      |      |      |      |      |      |      |      |      |      |      |      |      |     |
|------------------|---------------------------------------------------------------------------------------|------|------|------|------|------|------|------|------|------|------|------|------|------|------|------|------|------|------|-----|
|                  | Number of Imputation (highlighted indicates positive value in 10 or more imputations) |      |      |      |      |      |      |      |      |      |      |      |      |      |      |      |      |      |      |     |
|                  | 1                                                                                     | 2    | 3    | 4    | 5    | 6    | 7    | 8    | 9    | 10   | 11   | 12   | 13   | 14   | 15   | 16   | 17   | 18   | 19   | 20  |
| AKI              | 0                                                                                     | 6    | 0    | 11.3 | 15   | 6.9  | 8.5  | 7.9  | 8    | 5.9  | 17.2 | 12.6 | 5.6  | 24.7 | 0    | 5.1  | 4.9  | 9.7  | 5.4  | 12  |
| Alcohol prob     | 0                                                                                     | 0    | 0    | 0    | 0    | 0    | 0    | 0    | 0    | 0    | 0    | 0    | 0    | 0    | 0    | 0    | 0    | 0    | 0    | 0   |
| Healthcare cost  | 0                                                                                     | 0    | 0    | 0    | 0    | 0    | 0    | 0    | 0    | 0    | 0    | 0    | 0    | 0    | 0    | 0    | 0    | 0    | 0    | 0   |
| BMI              | 0                                                                                     | 0    | 0    | 0    | 0    | 0    | 0    | 0    | 0    | 0    | 0    | 0    | 0    | 0    | 0    | 0    | 0    | 0    | 0    | 0   |
| Chest pain       | 0                                                                                     | 0    | 0    | 0    | 0    | 0    | 0    | 0    | 0    | 0    | 0    | 0    | 0    | 0    | 0    | 0    | 0    | 0    | 0    | 0   |
| Activity level   | 0                                                                                     | 0    | 0    | 0    | 0    | 0    | 0    | 0    | 0    | 0    | 0    | 0    | 0    | 0    | 0    | 0    | 0    | 0    | 0    | 0   |
| Education        | 0                                                                                     | 0    | 0    | 0    | 0    | 0    | 0    | 0    | 0    | 0    | 0    | 0    | 0    | 0    | 0    | 0    | 0    | 0    | 0    | 0   |
| Finances         | 0                                                                                     | 0    | 0    | 0    | 0    | 0    | 0    | 0    | 0    | 0    | 0    | 0    | 0    | 0    | 0    | 0    | 0    | 0    | 0    | 0   |
| Diastolic BP     | 0                                                                                     | 2.2  | 0    | 2.8  | 2.1  | 2.2  | 10.8 | 6.9  | 7.7  | 5.8  | 13.1 | 12   | 6.1  | 9.5  | 0    | 9.4  | 0    | 6.6  | 5.2  | 3.1 |
| Arrhyth hosp     | 0                                                                                     | 0    | 0    | 0    | 2.1  | 0    | 0    | 0    | 0    | 0    | 2.3  | 1.7  | 1.8  | 2.4  | 0    | 1.5  | 0    | 1.9  | 1.8  | 0   |
| Bleeding         | 0                                                                                     | 0    | 0    | 0    | 0    | 0    | 0    | 0    | 0    | 0    | 0    | 0    | 0    | 0    | 0    | 0    | 0    | 0    | 0    | 0   |
| Heart failure    | 8.3                                                                                   | 0    | 19.6 | 15.4 | 7.3  | 0    | 3.5  | 0    | 0    | 0    | 1.5  | 0    | 0    | 2.9  | 0    | 1.4  | 5.8  | 0    | 0    | 0   |
| EF               | 91.7                                                                                  | 96.4 | 75.3 | 53.5 | 78.5 | 98.1 | 81.3 | 95.4 | 100  | 97   | 90.3 | 100  | 100  | 82.9 | 100  | 93.6 | 84.6 | 95.9 | 99   | 97  |
| Killip class     | 0                                                                                     | 0    | 0    | 0    | 0    | 0    | 0    | 0    | 0    | 0    | 0    | 0    | 0    | 0    | 0    | 0    | 0    | 0    | 0    | 0   |
| Living with      | 0                                                                                     | 0    | 0    | 0    | 0    | 0    | 0    | 0    | 0    | 0    | 0    | 0    | 0    | 0    | 0    | 0    | 0    | 0    | 0    | 0   |
| Male             | 0                                                                                     | 0    | 0    | 0    | 0    | 0    | 0    | 0    | 0    | 0    | 0    | 0    | 0    | 0    | 0    | 0    | 0    | 0    | 0    | 0   |
| Antiplatelet     | 0                                                                                     | 0    | 0    | 0    | 0    | 4.7  | 11.9 | 5    | 5.8  | 5.3  | 0    | 0    | 0    | 12   | 0    | 3.1  | 0    | 7.8  | 9.7  | 3.5 |
| Beta blocker     | 0                                                                                     | 0    | 0    | 0    | 0    | 0    | 0    | 0    | 0    | 0    | 0    | 0    | 0    | 0    | 0    | 0    | 0    | 0    | 0    | 0   |
| Arrhyth history  | 4.9                                                                                   | 50.3 | 7.6  | 57.7 | 40.3 | 35.1 | 39.9 | 52.3 | 28.8 | 52.9 | 59.4 | 35.2 | 31.8 | 37.6 | 16.6 | 26.1 | 55.7 | 36.6 | 52.3 | 34  |
| Cancer history   | 0                                                                                     | 0    | 0    | 0    | 0    | 0    | 0    | 0    | 0    | 0    | 0    | 0    | 0    | 0    | 0    | 0    | 0    | 0    | 0    | 0   |
| COPD             | 0                                                                                     | 44.2 | 7.2  | 44.4 | 44.8 | 28.1 | 31.3 | 30.2 | 26.6 | 42.7 | 28.5 | 34   | 27.4 | 44.3 | 14.7 | 37.5 | 0    | 41   | 48.7 | 18  |
| PAD              | 0                                                                                     | 0    | 0    | 0    | 0    | 0    | 0    | 0    | 0    | 0    | 0    | 0    | 0    | 0    | 0    | 0    | 0    | 0    | 0    | 0   |
| Prior revasc     | 0                                                                                     | 0    | 0    | 0    | 0    | 0    | 0    | 0    | 0    | 0    | 0    | 0    | 0    | 0    | 0    | 0    | 0    | 0    | 0    | 0   |
| Valvular dis     | 0                                                                                     | 6    | 0    | 0    | 0    | 4.6  | 0    | 6.1  | 0    | 0    | 0    | 0    | 5.1  | 0    | 0    | 5    | 0    | 0    | 0    | 0   |
| Revasc status    | 0                                                                                     | 0    | 0    | 0    | 0    | 0    | 0    | 0    | 0    | 0    | 0    | 0    | 0    | 0    | 0    | 0    | 0    | 0    | 0    | 0   |
| SF 12 gen health | 100                                                                                   | 71.5 | 100  | 99.1 | 88.4 | 94.5 | 98.8 | 85.7 | 100  | 75.7 | 93.2 | 95.1 | 91.9 | 98.9 | 100  | 96.2 | 100  | 93.2 | 77.6 | 100 |





|                  |      |     |      |      |    |      |     |      |      |     |      |     |      |     |      |     |      |     |     |     |
|------------------|------|-----|------|------|----|------|-----|------|------|-----|------|-----|------|-----|------|-----|------|-----|-----|-----|
| Male             | 0    | 0   | 0    | 0    | 0  | 0    | 0   | 0    | 0    | 0   | 0    | 0   | 0    | 0   | 0    | 0   | 0    | 0   | 0   | 0   |
| Antiplatelet     | 6.8  | 0   | 3.7  | 10.6 | 6  | 8.3  | 5.3 | 2.3  | 6.9  | 0   | 0    | 0   | 0    | 3.3 | 2.1  | 0   | 0    | 0   | 0   | 0   |
| Beta blocker     | 0    | 0   | 0    | 0    | 0  | 0    | 0   | 0    | 0    | 0   | 0    | 0   | 0    | 0   | 0    | 0   | 0    | 0   | 0   | 0   |
| Arrhyth history  | 0    | 0   | 26   | 0    | 0  | 0    | 0   | 0    | 0    | 0   | 0    | 0   | 0    | 0   | 0    | 0   | 0    | 0   | 0   | 0   |
| Cancer history   | 0    | 0   | 3.6  | 0    | 0  | 0    | 0   | 0    | 0    | 0   | 0    | 0   | 0    | 0   | 0    | 0   | 0    | 0   | 0   | 0   |
| COPD             | 0    | 0   | 0    | 0    | 0  | 0    | 0   | 0    | 0    | 0   | 0    | 0   | 0    | 0   | 0    | 0   | 0    | 0   | 0   | 0   |
| PAD              | 0    | 0   | 0    | 0    | 0  | 0    | 0   | 0    | 0    | 0   | 0    | 0   | 0    | 0   | 0    | 0   | 0    | 0   | 0   | 0   |
| Prior revasc     | 0    | 0   | 0    | 0    | 0  | 0    | 0   | 0    | 0    | 0   | 0    | 0   | 0    | 0   | 0    | 0   | 0    | 0   | 0   | 0   |
| Valvular dis     | 0    | 0   | 0    | 0    | 0  | 0    | 0   | 0    | 0    | 0   | 0    | 0   | 0    | 0   | 0    | 0   | 0    | 0   | 0   | 0   |
| Revasc status    | 0    | 0   | 0    | 0    | 0  | 0    | 0   | 0    | 0    | 0   | 0    | 0   | 0    | 0   | 0    | 0   | 0    | 0   | 0   | 0   |
| SF 12 gen health | 0    | 0   | 100  | 0    | 0  | 0    | 0   | 0    | 0    | 0   | 0    | 0   | 0    | 0   | 0    | 0   | 0    | 0   | 0   | 0   |
| Help chores      | 0    | 0   | 0    | 0    | 0  | 0    | 0   | 0    | 0    | 0   | 0    | 0   | 0    | 0   | 0    | 0   | 0    | 0   | 0   | 0   |
| TICS             | 1.9  | 0   | 0    | 0    | 0  | 0    | 2.4 | 0    | 0    | 0   | 0    | 3   | 3.2  | 0   | 2.4  | 2.5 | 3.7  | 0   | 2.3 | 0   |
| TUG              | 41.5 | 5.5 | 12.4 | 68.4 | 42 | 57.3 | 33  | 28.3 | 49.9 | 7.5 | 12.1 | 6.2 | 17.9 | 32  | 21.7 | 7.5 | 11.3 | 7.1 | 16  | 7.7 |
| Weight loss      | 0    | 0   | 0    | 0    | 0  | 0    | 0   | 0    | 0    | 0   | 0    | 0   | 0    | 0   | 0    | 0   | 0    | 0   | 0   | 0   |

\*Posterior effect probability = the probability that the predictor has a non-zero association with the mechanism that generates the outcome.

### Classifications used in eTable 3

|                 |                                                           |
|-----------------|-----------------------------------------------------------|
| AKI             | acute kidney injury (dichotomous)                         |
| Alcohol prob    | alcohol problem (dichotomous)                             |
| Healthcare cost | avoided healthcare due to cost (dichotomous)              |
| BMI             | body mass index (ordinal categories)                      |
| Chest pain      | chest pain before hospitalization (dichotomous)           |
| Activity level  | comparison active (categorical)                           |
| Education       | education less than or equal to high school (dichotomous) |

|                  |                                                               |
|------------------|---------------------------------------------------------------|
| Finances         | end of month finances (ordinal categories)                    |
| Diastolic BP     | first diastolic blood pressure (ordinal categories)           |
| Arrhyth hosp     | in-hospital arrhythmia (dichotomous)                          |
| Bleeding         | in-hospital bleeding (dichotomous)                            |
| Heart failure    | in-hospital heart failure (dichotomous)                       |
| EF               | in-hospital ejection fraction (ordinal categories)            |
| Killip class     | Killip class above one (dichotomous)                          |
| Living with      | live with someone (dichotomous)                               |
| Male             | male gender (dichotomous)                                     |
| Antiplatelet     | use of anti-platelet medication (dichotomous)                 |
| Beta blocker     | use of beta-blockers (dichotomous)                            |
| Arrhyth history  | prior history of arrhythmia (dichotomous)                     |
| Cancer history   | prior history of cancer (dichotomous)                         |
| COPD             | prior history of COPD (dichotomous)                           |
| PAD              | prior history of peripheral artery disease (dichotomous)      |
| Prior revasc     | prior history of revascularization (dichotomous)              |
| Valvular dis     | prior history of valve disease (dichotomous)                  |
| Revasc status    | revascularization status (categorical)                        |
| SF 12 gen health | Short Form 12 question on general health (ordinal categories) |
| Help chores      | need someone to help with chores (dichotomous)                |
| TICS             | Telephone Interview for Cognitive Status (categorical)        |
| TUG              | Timed Up and Go (categorical)                                 |
| Weight loss      | unintended weight loss in last year (dichotomous)             |

**eTable 4: Full regression results for 30-day readmission risk model**

|                                           | <b>Beta</b> | <b>Standardized Beta</b> | <b>OR (95% CI)</b> | <b>P value</b> |
|-------------------------------------------|-------------|--------------------------|--------------------|----------------|
| TUG >25 seconds                           | 0.618281    | 3.55                     | 1.86 (1.32-2.61)   | 0.0004         |
| COPD                                      | 0.415968    | 2.76                     | 1.52 (1.13-2.04)   | 0.0058         |
| Unable to complete TUG                    | 0.395818    | 1.99                     | 1.49 (1.01-2.19)   | 0.0462         |
| TUG 15-25 seconds                         | 0.375748    | 1.85                     | 1.46 (0.98-2.17)   | 0.0642         |
| Prior arrhythmia                          | 0.309003    | 3.04                     | 1.36 (1.12-1.66)   | 0.0023         |
| Acute kidney injury                       | 0.284460    | 2.05                     | 1.33 (1.01-1.74)   | 0.0405         |
| Ejection fraction                         | 0.176471    | 3.26                     | 1.19 (1.07-2.33)   | 0.0011         |
| Short form 12 general health status       | 0.162956    | 2.61                     | 1.18 (1.04-1.33)   | 0.0090         |
| Diastolic BP (mmHg per 10 point increase) | -0.075392   | 2.50                     | 0.93 (0.87-0.98)   | 0.0126         |
| P2Y12 inhibitor use                       | -0.224867   | 1.63                     | 0.80 (0.61-1.05)   | 0.1035         |

**eFigure 1. SILVER-AMI Screening/Enrollment Details**

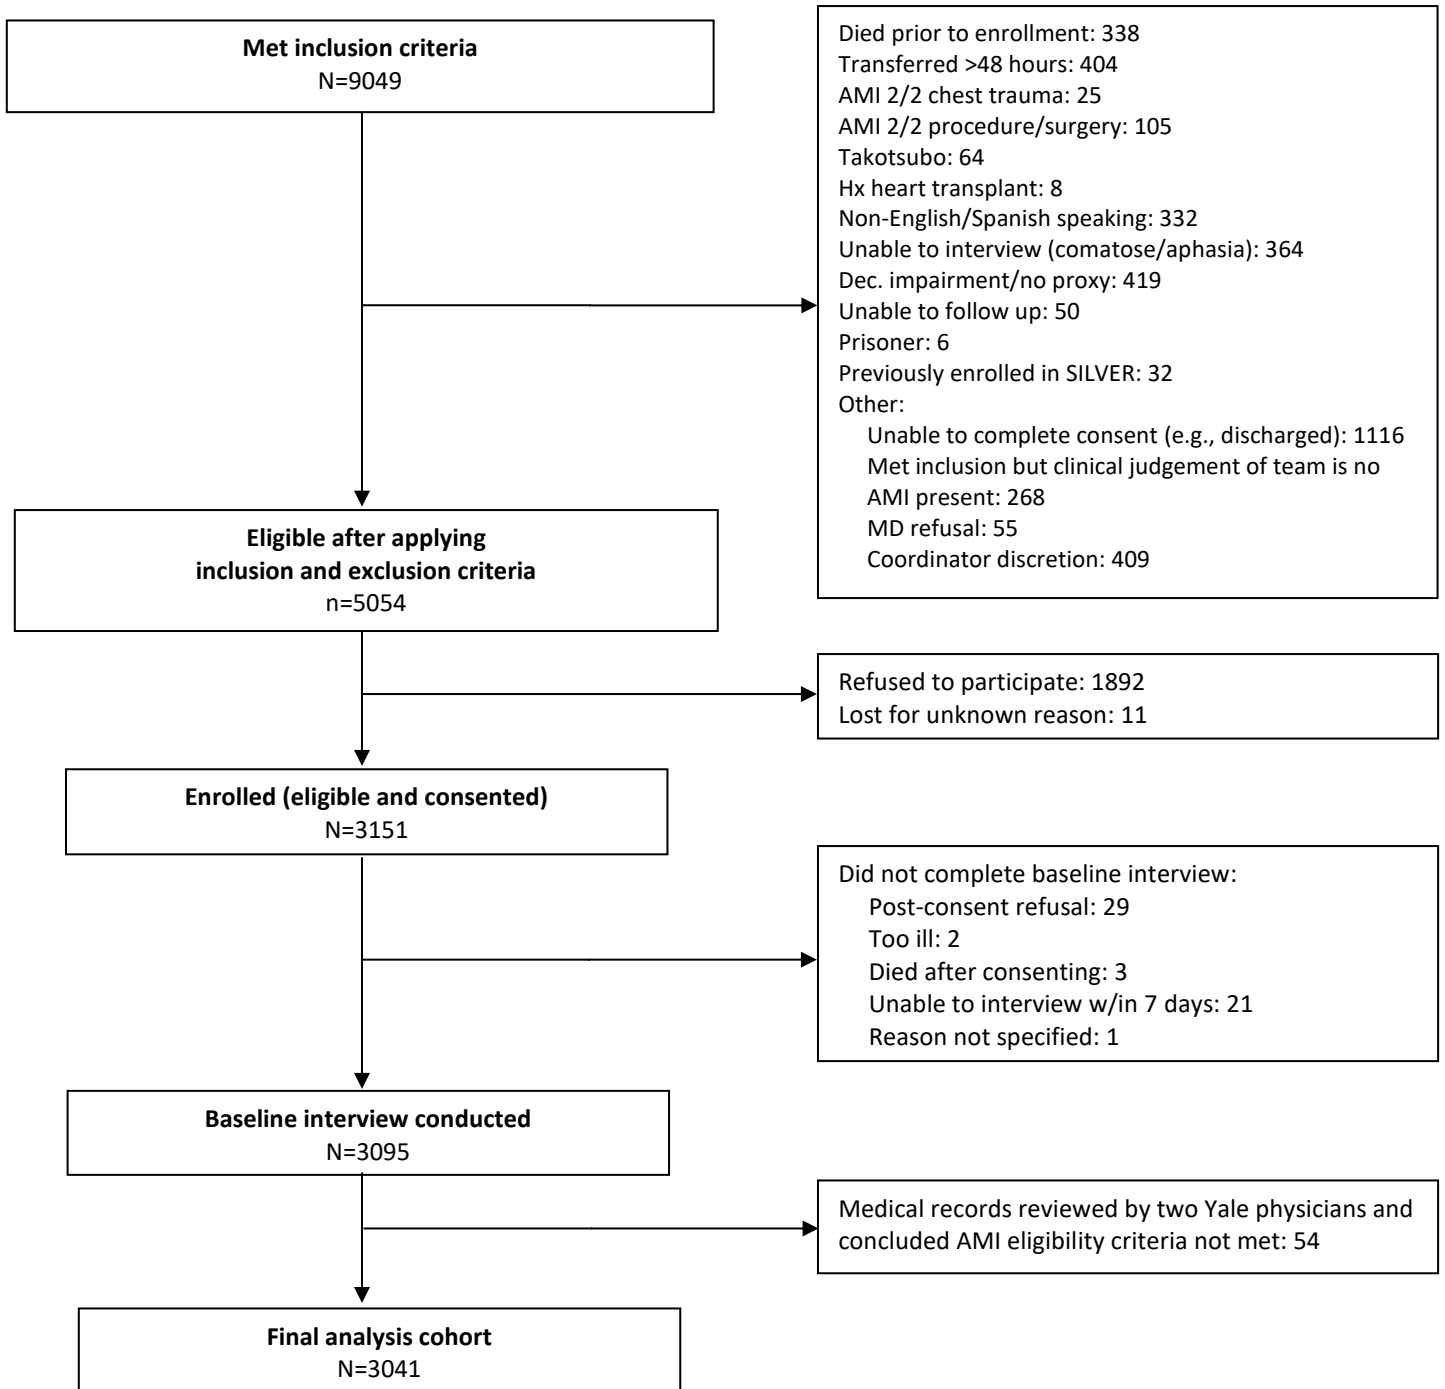

Supplement: NIHMS1525784-supplement-Supplemental_Material.pdf [file NIHMS1525784-supplement-Supplemental_Material.pdf]
